# Supplementary material for: No Effects of a Brief Mindfulness Intervention on Controlled Motivation and Amotivation, but Effect Moderation Through Trait Mindfulness: a Randomized Controlled Trial
Source: Springer Nature journal article supplement (doi:10.1007/s12671-022-01968-7), 2022-08-24
Supplement: MOESM1 [file 23402304]

## Supplementary Material

**Table S1**

CONSORT Checklist

| Section/Topic             | Item No | Checklist item                                                                                                                        | Reported on page No |
|---------------------------|---------|---------------------------------------------------------------------------------------------------------------------------------------|---------------------|
| <b>Title and abstract</b> |         |                                                                                                                                       |                     |
|                           | 1a      | Identification as a randomised trial in the title                                                                                     | 1                   |
|                           | 1b      | Structured summary of trial design, methods, results, and conclusions (for specific guidance see CONSORT for abstracts)               | 3                   |
| <b>Introduction</b>       |         |                                                                                                                                       |                     |
| Background and objectives | 2a      | Scientific background and explanation of rationale                                                                                    | 4-7                 |
|                           | 2b      | Specific objectives or hypotheses                                                                                                     | 8                   |
| <b>Methods</b>            |         |                                                                                                                                       |                     |
|                           | 3a      | Description of trial design (such as parallel, factorial) including allocation ratio                                                  | 12                  |
|                           | 3b      | Important changes to methods after trial commencement (such as eligibility criteria), with reasons                                    | /                   |
| Participants              | 4a      | Eligibility criteria for participants                                                                                                 | 11                  |
|                           | 4b      | Settings and locations where the data were collected                                                                                  | 11-12               |
| Interventions             | 5       | The interventions for each group with sufficient details to allow replication, including how and when they were actually administered | 11                  |
| Outcomes                  | 6a      | Completely defined pre-specified primary and secondary outcome measures, including how and when they were assessed                    | 10-12               |
|                           | 6b      | Any changes to trial outcomes after the trial commenced, with reasons                                                                 | /                   |
| Sample size               | 7a      | How sample size was determined                                                                                                        | 13-14               |
|                           | 7b      | When applicable, explanation of any interim analyses and stopping guidelines                                                          | /                   |
| Randomisation:            |         |                                                                                                                                       |                     |
| Sequence generation       | 8a      | Method used to generate the random allocation sequence                                                                                | 12                  |
|                           | 8b      | Type of randomisation; details of any restriction (such as blocking and block size)                                                   | 12                  |

|                                                      |     |                                                                                                                                                                                             |        |
|------------------------------------------------------|-----|---------------------------------------------------------------------------------------------------------------------------------------------------------------------------------------------|--------|
| Allocation concealment mechanism                     | 9   | Mechanism used to implement the random allocation sequence (such as sequentially numbered containers), describing any steps taken to conceal the sequence until interventions were assigned | 12     |
| Implementation                                       | 10  | Who generated the random allocation sequence, who enrolled participants, and who assigned participants to interventions                                                                     | 12     |
| Blinding                                             | 11a | If done, who was blinded after assignment to interventions (for example, participants, care providers, those assessing outcomes) and how/                                                   | /      |
|                                                      | 11b | If relevant, description of the similarity of interventions                                                                                                                                 | 11     |
| Statistical methods                                  | 12a | Statistical methods used to compare groups for primary and secondary outcomes                                                                                                               | 14-15  |
|                                                      | 12b | Methods for additional analyses, such as subgroup analyses and adjusted analyses                                                                                                            | /      |
| <b>Results</b>                                       |     |                                                                                                                                                                                             |        |
| Participant flow (a diagram is strongly recommended) | 13a | For each group, the numbers of participants who were randomly assigned, received intended treatment, and were analysed for the primary outcome                                              | 12-13  |
|                                                      | 13b | For each group, losses and exclusions after randomisation, together with reasons                                                                                                            | 12-13  |
| Recruitment                                          | 14a | Dates defining the periods of recruitment and follow-up                                                                                                                                     | 11     |
|                                                      | 14b | Why the trial ended or was stopped                                                                                                                                                          | /      |
| Baseline data                                        | 15  | A table showing baseline demographic and clinical characteristics for each group                                                                                                            | 29     |
| Numbers analysed                                     | 16  | For each group, number of participants (denominator) included in each analysis and whether the analysis was by original assigned groups                                                     | 12-13  |
| Outcomes and estimation                              | 17a | For each primary and secondary outcome, results for each group, and the estimated effect size and its precision (such as 95% confidence interval)                                           | 15-17  |
|                                                      | 17b | For binary outcomes, presentation of both absolute and relative effect sizes is recommended                                                                                                 | /      |
| Ancillary analyses                                   | 18  | Results of any other analyses performed, including subgroup analyses and adjusted analyses, distinguishing pre-specified from exploratory                                                   | /      |
| Harms                                                | 19  | All important harms or unintended effects in each group (for specific guidance see CONSORT for harms)                                                                                       | /      |
| <b>Discussion</b>                                    |     |                                                                                                                                                                                             |        |
| Limitations                                          | 20  | Trial limitations, addressing sources of potential bias, imprecision, and, if relevant, multiplicity of analyses                                                                            | 21-22  |
| Generalisability                                     | 21  | Generalisability (external validity, applicability) of the trial findings                                                                                                                   | 19 -21 |
| Interpretation                                       | 22  | Interpretation consistent with results, balancing benefits and harms, and considering other relevant evidence                                                                               | 17-19  |
| <b>Other information</b>                             |     |                                                                                                                                                                                             |        |

|              |    |                                                                                 |                          |
|--------------|----|---------------------------------------------------------------------------------|--------------------------|
| Registration | 23 | Registration number and name of trial registry                                  | <u>        /        </u> |
| Protocol     | 24 | Where the full trial protocol can be accessed, if available                     | <u>        /        </u> |
| Funding      | 25 | Sources of funding and other support (such as supply of drugs), role of funders | <u>        2        </u> |

**Table S2***Sample Characteristics of Included versus Excluded Participants*

| Characteristic           | Included ( <i>n</i> = 91) |      | Excluded ( <i>n</i> = 87) |      | $\chi^2(df)$ |
|--------------------------|---------------------------|------|---------------------------|------|--------------|
|                          | <i>n</i>                  | %    | <i>n</i>                  | %    |              |
| Sex                      |                           |      |                           |      |              |
| Female                   | 58                        | 65.7 | 49                        | 56.3 | 0.33(1)      |
| Missing                  |                           |      | 15                        | 17.2 |              |
| Meditation Experience    |                           |      |                           |      | 1.18(2)      |
| Yes                      | 22                        | 24.2 | 19                        | 21.8 |              |
| Yes, but quit meditating | 14                        | 15.4 | 14                        | 16.1 |              |
| Never                    | 55                        | 60.4 | 36                        | 41.1 |              |
| Missing                  |                           |      | 18                        | 20.7 |              |
| Nationality              |                           |      |                           |      | 9.68(2)*     |
| Austria                  | 28                        | 30.8 | 38                        | 43.7 |              |
| Germany                  | 31                        | 34.1 | 12                        | 13.8 |              |
| Other                    | 32                        | 35.2 | 22                        | 25.3 |              |
| Missing                  |                           |      | 15                        | 17.2 |              |
| Highest education        |                           |      |                           |      | 5.73(4)      |
| Compulsory school        | 0                         | 0.0  | 2                         | 2.3  |              |
| Apprenticeship           | 3                         | 3.3  | 0                         | 0.0  |              |
| Secondary education      | 52                        | 57.1 | 41                        | 47.1 |              |
| Bachelor/Master          | 31                        | 34.1 | 27                        | 31.0 |              |
| PhD                      | 5                         | 5.5  | 2                         | 2.3  |              |
| Missing                  |                           |      | 15                        | 17.2 |              |
| Currently Studying       | 46                        | 49.5 | 43                        | 49.4 | 1.62(1)      |
| Missing                  |                           |      | 16                        | 18.4 |              |
| Employment Status        | 64                        | 70.3 | 50                        | 57.5 | 0.00(1)      |
| Missing                  |                           |      | 16                        | 18.4 |              |

Note. \* $p < .05$ .

**Table S3**

*Sample Characteristics of Participants Discontinuing Intervention, Comparing the Intervention and Control Groups*

| Characteristic           | Intervention<br>( <i>n</i> = 20) |    | Control ( <i>n</i> = 20) |    | $\chi^2(df)$ |
|--------------------------|----------------------------------|----|--------------------------|----|--------------|
|                          | <i>n</i>                         | %  | <i>n</i>                 | %  |              |
| Sex                      |                                  |    |                          |    |              |
| Female                   | 15                               | 75 | 13                       | 65 | 0.47(1)      |
| Meditation Experience    |                                  |    |                          |    | 2.74(1)      |
| Yes                      | 8                                | 40 | 5                        | 25 |              |
| Yes, but quit meditating | 2                                | 30 | 6                        | 10 |              |
| Never                    | 10                               | 45 | 9                        | 50 |              |
| Nationality              |                                  |    |                          |    | 0.46(2)      |
| Austria                  | 11                               | 55 | 9                        | 45 |              |
| Germany                  | 2                                | 10 | 3                        | 15 |              |
| Other                    | 7                                | 35 | 8                        | 40 |              |
| Highest education        |                                  |    |                          |    | 2.55(4)      |
| Compulsory school        | 1                                | 5  | 1                        | 5  |              |
| Apprenticeship           | 1                                | 5  | 2                        | 10 |              |
| Secondary education      | 8                                | 40 | 10                       | 50 |              |
| Bachelor/Master          | 10                               | 50 | 6                        | 30 |              |
| PhD                      |                                  |    | 1                        | 5  |              |
| Currently Studying       | 14                               | 70 | 12                       | 60 | 0.44(1)      |
| Employment Status        | 13                               | 65 | 16                       | 80 | 1.12(1)      |

**Table S4**

*Motivation Means Before and After the Intervention for the Intervention and Control Groups*

| Motivation  | Intervention ( <i>n</i> = 43) |      | Control ( <i>n</i> = 48) |      |
|-------------|-------------------------------|------|--------------------------|------|
|             | T0                            | T1   | T0                       | T1   |
| SDI         | 5.77                          | 7.48 | 6.79                     | 7.45 |
| Intrinsic   | 3.94                          | 4.23 | 4.14                     | 4.26 |
| Identified  | 5.50                          | 5.70 | 5.41                     | 5.33 |
| External    | 4.33                          | 3.77 | 3.86                     | 3.39 |
| Amotivation | 1.64                          | 1.45 | 1.52                     | 1.51 |

*Note.* SDI = self-determination index (Paixão et al., 2017).

**Table S5***Facets of the FFMQ predicting Post-Interventional Situational Motivation*

| Predictor                                | Observe         | Describe        | Nonjudging      | Acting with Awareness | Nonreacting     |
|------------------------------------------|-----------------|-----------------|-----------------|-----------------------|-----------------|
| Model 3                                  |                 |                 |                 |                       |                 |
| Baseline situational motivation          | 0.91 (0.04)***  | 0.92 (0.04)***  | 0.93 (0.04)***  | 0.92 (0.04)***        | 0.92 (0.04)***  |
| Group (intervention vs. control)         | 0.95 (0.44)*    | 0.93 (0.42)*    | 1.00 (0.43)*    | 0.96 (0.44)*          | 0.98 (0.44)*    |
| Observe                                  | 0.15 (0.13)     | 0.03 (0.09)     | 0.06 (0.09)     | 0.01 (0.09)           | 0.01 (0.09)     |
| Describe                                 | 0.00 (0.09)     | 0.24 (0.11)*    | -0.04 (0.09)    | -0.02 (0.09)          | -0.03 (0.09)    |
| Nonjudging of Inner Experience           | -0.003 (0.10)   | -0.05 (0.09)    | 0.10 (0.11)     | -0.01 (0.09)          | -0.05 (0.09)    |
| Acting with Awareness                    | -0.002 (0.09)   | 0.02 (0.08)     | 0.06 (0.08)     | 0.14 (0.10)           | 0.02 (0.09)     |
| Nonreacting to Inner Experience          | -0.01 (0.06)    | -0.02 (0.06)    | -0.01(0.06)     | 0.004 (0.06)          | 0.10 (0.08)     |
| Trait mindfulness facet in focus * group | -0.26 (0.20)    | -0.52 (0.17)**  | -0.30 (0.14)*   | -0.25 (0.14)          | -0.15 (0.09)    |
| <i>F(df<sub>1</sub>, df<sub>2</sub>)</i> | 66.59(8, 82)*** | 73.76(8, 82)*** | 69.45(8, 82)*** | 67.76(8, 82)***       | 67.34(8, 82)*** |
| Adjusted <i>R</i> <sup>2</sup>           | 85%             | 86%             | 86%             | 85%                   | 86%             |

*Note.* Entries are unstandardized regression coefficients (standard errors in parentheses), unless noted otherwise. For the individual predictors, *t* values can be computed by dividing the provided parameter estimates by their standard errors.

\**p* < .05, \*\**p* < .01, \*\*\**p* < .001.

**Table S6**

*Predicting all Four Types of Motivation in a Multilevel Model, Testing for Differences Between the Four Types*

| Predictor                                                      | <i>B</i> ( <i>SE</i> ) | <i>p</i>        |
|----------------------------------------------------------------|------------------------|-----------------|
| <b>Type of motivation (intercept; identified motivation)</b>   | <b>5.35 (0.10)</b>     | <b>&lt;.001</b> |
| <b>Intrinsic</b>                                               | <b>-1.18 (0.14)</b>    | <b>&lt;.001</b> |
| <b>External</b>                                                | <b>-0.96 (0.14)</b>    | <b>&lt;.001</b> |
| <b>Amotivation</b>                                             | <b>+1.09 (0.14)</b>    | <b>&lt;.001</b> |
| <b>Baseline motivation (identified motivation)</b>             | <b>0.71 (0.07)</b>     | <b>&lt;.001</b> |
| <b>Intrinsic</b>                                               | <b>+0.21 (0.08)</b>    | <b>.011</b>     |
| <b>External</b>                                                | <b>+0.27 (0.08)</b>    | <b>.001</b>     |
| Amotivation                                                    | +0.04 (0.12)           | .705            |
| <b>Group (intervention vs. control; identified motivation)</b> | <b>0.31 (0.14)</b>     | <b>.029</b>     |
| Intrinsic                                                      | -0.17 (0.20)           | .399            |
| External                                                       | -0.24 (0.20)           | .220            |
| Amotivation                                                    | -0.16 (0.20)           | .415            |
| Trait mindfulness (identified motivation)                      | 0.01 (0.01)            | .126            |
| Intrinsic                                                      | -0.001 (0.01)          | .890            |
| External                                                       | -0.01 (0.01)           | .483            |
| Amotivation                                                    | -0.005 (0.01)          | .668            |
| Trait mindfulness * group (identified motivation)              | -0.02 (0.01)           | .073            |
| Intrinsic                                                      | -0.002 (0.02)          | .914            |
| External                                                       | +0.01 (0.02)           | .669            |
| Amotivation                                                    | +0.01 (0.02)           | .678            |

*Note.* The multilevel model included all four types of motivation as outcome variables (T1 scores) and predictors (T0 scores). External motivation and amotivation scores were reversed in polarity to align them in direction with the remaining other two types of motivation. All continuous predictors were centered before analysis. In the model, the four types of motivation were differentiated by using three dummy variables, utilizing identified motivation as the common comparator. The model also included interactions of these dummy variables with the other predictors. All lines reading “identified motivation” present parameter estimates for the common comparator. All other lines refer to the respective other three types of motivation, compared to this common comparator, i.e., they present deviations to the respective parameter estimates of the common comparator. The restricted maximum likelihood method was used for parameter estimation, applying a Satterthwaite approximation to the degrees of freedom for the statistical tests of each parameter or deviation. Significant ( $p < .05$ ) model terms are printed boldface.

The results suggested that (1) the various types of motivation differed significantly in mean levels from the common comparator, identified motivation; (2) baseline motivation had a significant effect on each type of motivation – this effect was significantly even stronger for intrinsic and external motivation than identified motivation; (3) there was a significant overall intervention effect that did not differ between types of motivation; (4) trait mindfulness had no significant main effect on any type of motivation; (5) there was some indication (though not statistically significant,  $p = .073$ ) of a trait mindfulness \* group interaction that did not differ between types of motivation. However, collapsing this interaction across all types of motivation to increase the analytical power of the model, the trait mindfulness \* group interaction was statistically significant ( $B = -0.02$ ,  $SE = 0.006$ ,  $p = .002$ ).

## Manipulation-Check Items

### Original contents (Hafenbrack & Vohs, 2018)

Please answer the following questions in terms of how you are feeling RIGHT NOW.  
Scale: 1 (*not much at all*) to 7 (*extremely*)

1. To what extent are you focused on the present moment right now?
2. To what extent are you focused on your breathing right now?
3. To what extent are you focused on the physical sensations of your breath right now?
4. To what extent are you in touch with your body right now?
5. To what extent are you absorbed in the present moment right now?
6. To what extent are you thinking about the present moment right now?

### German translation (using the parallel-blind technique; Behling & Law, 2000)

Bitte beantworten Sie die folgenden Fragen in Bezug darauf, wie Sie sich JETZT GERADE fühlen.

Skala: 1 (*so gut wie gar nicht*) bis 7 (*extrem*)

1. In welchem Ausmaß konzentrieren Sie sich jetzt gerade auf den gegenwärtigen Moment?
2. In welchem Ausmaß konzentrieren Sie sich jetzt gerade auf Ihre Atmung?  
[In welchem Ausmaß konzentrieren Sie sich jetzt gerade auf die körperlichen Empfindungen Ihres Atems?; former Item 3, excluded for its similarity to Item 2]
3. In welchem Ausmaß sind Sie jetzt gerade in Kontakt mit Ihrem Körper?
4. In welchem Ausmaß sind Sie jetzt gerade in den gegenwärtigen Moment vertieft?
5. In welchem Ausmaß denken Sie jetzt gerade über den gegenwärtigen Moment nach?

## References

- Behling, O., & Law, K. S. (2000). *Translating questionnaires and other research instruments: Problems and solutions*. Sage.  
<https://dx.doi.org/10.4135/9781412986373>
- Hafenbrack, A. C., & Vohs, K. D. (2018). Mindfulness meditation impairs task motivation but not performance. *Organizational Behavior and Human Decision Processes*, 147, 1-15. <https://doi.org/10.1016/j.obhdp.2018.05.001>
- Paixão, O., Gamboa, V., & Valadas, S. (2017). Validation of a Portuguese version of the Situational Motivation Scale (SIMS) in academic contexts. *Avances en Psicología Latinoamericana*, 35(3), 547-557.  
<https://doi.org/10.12804/revistas.urosario.edu.co/apl/a.4767>
